# Supplementary material for: Conditioned Medium of Intervertebral Disc Cells Inhibits Osteo-Genesis on Autologous Bone-Marrow-Derived Mesenchymal Stromal Cells and Osteoblasts
Source: MDPI journal article supplement (doi:10.3390/biomedicines12020376), 2024-02-06

**Figure S1.** Col2/Col1 gene expression ratio of donor-matched primary cell types at passage 2-4 in OB, MSC, AFC, CEPC, and NPC. The graph clearly demonstrates that AFC, CEPC and NPC in increasing order do express higher levels of col2, which is absent in OBs and MSCs. Mean  $\pm$  SD, N = 3 donors.

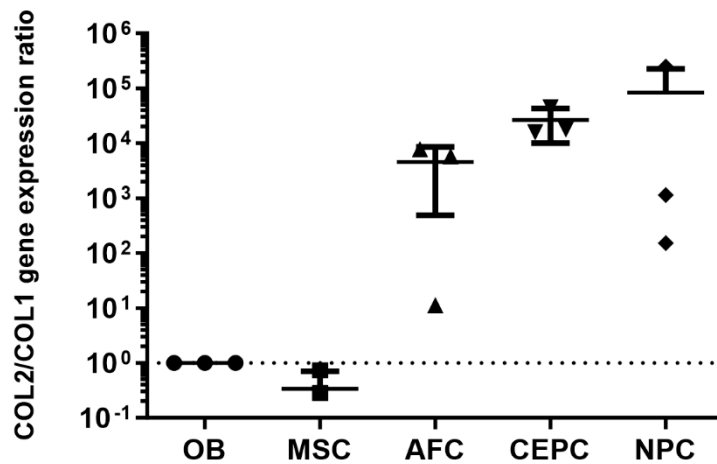

Supplement: s1 [file s1]
